# Supplementary material for: In situ hydrothermal synthesis of dysprosium(iii) single-molecule magnet with lanthanide salt as catalyst
Source: Royal Society of Chemistry journal article supplement (doi:10.1039/c2dt30175j), 2012-01-01
Supplement: c2dt30175j.pdf [file c2dt30175j.pdf]

## Supporting Information for:

### *In situ* hydrothermal synthesis of dysprosium(III) single-molecule magnet with lanthanide salt as catalyst

Li Liang,<sup>a</sup> Guo Peng,<sup>a</sup> Li Guizhu,<sup>a</sup> Yanhua Lan,<sup>\*b</sup> Annie K Powell,<sup>b</sup> Hong Deng<sup>\*a</sup>

**Table S1** Selected bond distances (Å) and angles (°) for complexes **1** and **3-6**

| Complex <b>1</b> <sup>(a)</sup> |            |                    |            |
|---------------------------------|------------|--------------------|------------|
| Gd(1)-O(8)#1                    | 2.2852(19) | Gd(1)-O(7)         | 2.339(2)   |
| Gd(1)-O(3W)                     | 2.3420     | Gd(1)-O(9)         | 2.3938(19) |
| Gd(1)-O(6W)                     | 2.3988     | Gd(1)-O(5W)        | 2.4353     |
| Gd(1)-O(4W)                     | 2.4385     | Gd(1)-O(10)        | 2.6240(9)  |
| O(8)#1-Gd(1)-O(7)               | 97.96(7)   | O(8)#1-Gd(1)-O(3W) | 93.53(7)   |
| O(7)-Gd(1)-O(3W)                | 73.12(6)   | O(8)#1-Gd(1)-O(9)  | 133.26(7)  |
| O(7)-Gd(1)-O(9)                 | 121.42(7)  | O(3W)-Gd(1)-O(9)   | 76.88(6)   |
| O(8)#1-Gd(1)-O(6W)              | 87.14(6)   | O(7)-Gd(1)-O(6W)   | 142.29(6)  |
| O(3W)-Gd(1)-O(6W)               | 144.2      | O(9)-Gd(1)-O(6W)   | 76.81(6)   |
| O(8)#1-Gd(1)-O(5W)              | 76.38(6)   | O(7)-Gd(1)-O(5W)   | 74.23(6)   |
| O(3W)-Gd(1)-O(5W)               | 144.0      | O(9)-Gd(1)-O(5W)   | 134.55(6)  |
| O(6W)-Gd(1)-O(5W)               | 70.8       | O(8)#1-Gd(1)-O(4W) | 155.57(6)  |
| O(7)-Gd(1)-O(4W)                | 76.24(6)   | O(3W)-Gd(1)-O(4W)  | 107.0      |
| O(9)-Gd(1)-O(4W)                | 66.23(5)   | O(6W)-Gd(1)-O(4W)  | 83.8       |
| O(5W)-Gd(1)-O(4W)               | 79.2       | O(8)#1-Gd(1)-O(10) | 81.88(6)   |
| O(7)-Gd(1)-O(10)                | 145.03(6)  | O(3W)-Gd(1)-O(10)  | 72.00(3)   |
| O(9)-Gd(1)-O(10)                | 51.51(5)   | O(6W)-Gd(1)-O(10)  | 72.65(3)   |
| O(5W)-Gd(1)-O(10)               | 137.96(4)  | O(4W)-Gd(1)-O(10)  | 116.59(3)  |
| Complex <b>3</b> <sup>(b)</sup> |            |                    |            |
| Eu(1)-O(8)#1                    | 2.289(3)   | Eu(1)-O(7)         | 2.351(3)   |
| Eu(1)-O(4W)                     | 2.358(4)   | Eu(1)-O(9)         | 2.403(3)   |
| Eu(1)-O(6W)                     | 2.415(3)   | Eu(1)-O(5W)        | 2.448(3)   |
| Eu(1)-O(3W)                     | 2.459(3)   | Eu(1)-O(10)        | 2.635(3)   |
| O(8)#1-Eu(1)-O(7)               | 98.92(10)  | O(8)#1-Eu(1)-O(4W) | 93.95(14)  |
| O(7)-Eu(1)-O(4W)                | 73.13(12)  | O(8)#1-Eu(1)-O(9)  | 133.11(10) |
| O(7)-Eu(1)-O(9)                 | 120.97(10) | O(4W)-Eu(1)-O(9)   | 76.99(11)  |
| O(8)#1-Eu(1)-O(6W)              | 86.55(12)  | O(7)-Eu(1)-O(6W)   | 142.35(12) |
| O(4W)-Eu(1)-O(6W)               | 144.04(13) | O(9)-Eu(1)-O(6W)   | 76.68(11)  |
| O(8)#1-Eu(1)-O(5W)              | 76.49(12)  | O(7)-Eu(1)-O(5W)   | 73.97(12)  |

|                   |            |                    |            |
|-------------------|------------|--------------------|------------|
| O(4W)-Eu(1)-O(5W) | 143.73(13) | O(9)-Eu(1)-O(5W)   | 134.45(12) |
| O(6W)-Eu(1)-O(5W) | 71.20(13)  | O(8)#1-Eu(1)-O(3W) | 155.49(11) |
| O(7)-Eu(1)-O(3W)  | 75.73(11)  | O(4W)-Eu(1)-O(3W)  | 106.90(14) |
| O(9)-Eu(1)-O(3W)  | 66.07(10)  | O(6W)-Eu(1)-O(3W)  | 84.01(13)  |
| O(5W)-Eu(1)-O(3W) | 79.06(11)  | O(8)#1-Eu(1)-O(10) | 82.00(10)  |
| O(7)-Eu(1)-O(10)  | 145.07(11) | O(4W)-Eu(1)-O(10)  | 71.98(12)  |
| O(9)-Eu(1)-O(10)  | 51.29(9)   | O(6W)-Eu(1)-O(10)  | 72.50(12)  |
| O(5W)-Eu(1)-O(10) | 138.53(11) | O(3W)-Eu(1)-O(10)  | 116.26(10) |

**Complex 4<sup>(c)</sup>**

|                     |             |                     |           |
|---------------------|-------------|---------------------|-----------|
| Tb(1)-O(7)          | 2.375(2)    | Tb(1)-O(8)          | 2.625(2)  |
| Tb(1)-O(9)          | 2.266(2)    | Tb(1)#1-O(10)       | 2.3275(9) |
| Tb(1)-O(4W)         | 2.3818      | Tb(1)-O(5W)         | 2.4286    |
| Tb(1)-O(6W)         | 2.4153      | Tb(1)-O(10)#1       | 2.3275(9) |
| O(9)-Tb(1)-O(3W)    | 93.08(7)    | O(9)-Tb(1)-O(10)#1  | 97.20(6)  |
| O(3W)-Tb(1)-O(10)#1 | 72.93(4)    | O(9)-Tb(1)-O(7)     | 133.14(8) |
| O(3W)-Tb(1)-O(7)    | 76.76(6)    | O(10)#1-Tb(1)-O(7)  | 121.83(6) |
| O(9)-Tb(1)-O(4W)    | 87.59(7)    | O(3W)-Tb(1)-O(4W)   | 144.1     |
| O(10)#1-Tb(1)-O(4W) | 142.560(18) | O(7)-Tb(1)-O(4W)    | 76.84(6)  |
| O(9)-Tb(1)-O(6W)    | 76.58(6)    | O(3W)-Tb(1)-O(6W)   | 144.0     |
| O(10)#1-Tb(1)-O(6W) | 74.33(4)    | O(7)-Tb(1)-O(6W)    | 134.74(6) |
| O(4W)-Tb(1)-O(6W)   | 70.7        | O(9)-Tb(1)-O(5W)    | 155.96(7) |
| O(3W)-Tb(1)-O(5W)   | 106.7       | O(10)#1-Tb(1)-O(5W) | 76.39(4)  |
| O(7)-Tb(1)-O(5W)    | 66.53(6)    | O(4W)-Tb(1)-O(5W)   | 84.3      |
| O(6W)-Tb(1)-O(5W)   | 79.4        | O(9)-Tb(1)-O(8)     | 81.43(7)  |
| O(3W)-Tb(1)-O(8)    | 72.04(6)    | O(10)#1-Tb(1)-O(8)  | 144.80(6) |
| O(7)-Tb(1)-O(8)     | 51.80(7)    | O(4W)-Tb(1)-O(8)    | 72.63(6)  |
| O(6W)-Tb(1)-O(8)    | 137.67(6)   | O(5W)-Tb(1)-O(8)    | 117.22(5) |

**Complex 5<sup>(d)</sup>**

|                    |            |                    |            |
|--------------------|------------|--------------------|------------|
| Sm(1)-O(1)         | 2.357(2)   | Sm(1)-O(3W)        | 2.485(2)   |
| Sm(1)#1-O(2)       | 2.307(2)   | Sm(1)-O(4W)        | 2.367(3)   |
| Sm(1)-O(5)         | 2.645(3)   | Sm(1)-O(5W)        | 2.431(3)   |
| Sm(1)-O(6)         | 2.414(2)   | Sm(1)-O(6W)        | 2.446(3)   |
| O(2)#1-Sm(1)-O(1)  | 100.32(9)  | O(2)#1-Sm(1)-O(4W) | 94.92(12)  |
| O(1)-Sm(1)-O(4W)   | 73.15(10)  | O(2)#1-Sm(1)-O(6)  | 132.78(9)  |
| O(1)-Sm(1)-O(6)    | 120.32(8)  | O(4W)-Sm(1)-O(6)   | 76.74(10)  |
| O(2)#1-Sm(1)-O(5W) | 86.14(10)  | O(1)-Sm(1)-O(5W)   | 142.02(11) |
| O(4W)-Sm(1)-O(5W)  | 144.11(11) | O(6)-Sm(1)-O(5W)   | 76.47(9)   |
| O(2)#1-Sm(1)-O(6W) | 76.80(10)  | O(1)-Sm(1)-O(6W)   | 73.92(10)  |
| O(4W)-Sm(1)-O(6W)  | 143.88(11) | O(6)-Sm(1)-O(6W)   | 134.10(10) |
| O(5W)-Sm(1)-O(6W)  | 71.26(11)  | O(2)#1-Sm(1)-O(3W) | 155.53(10) |
| O(1)-Sm(1)-O(3W)   | 75.38(9)   | O(4W)-Sm(1)-O(3W)  | 106.45(11) |
| O(6)-Sm(1)-O(3W)   | 65.61(9)   | O(5W)-Sm(1)-O(3W)  | 83.45(11)  |
| O(6W)-Sm(1)-O(3W)  | 78.89(10)  | O(2)#1-Sm(1)-O(5)  | 81.87(8)   |
| O(1)-Sm(1)-O(5)    | 145.07(9)  | O(4W)-Sm(1)-O(5)   | 71.94(10)  |

|                                |             |                     |            |
|--------------------------------|-------------|---------------------|------------|
| O(6)-Sm(1)-O(5)                | 51.16(8)    | O(5W)-Sm(1)-O(5)    | 72.72(10)  |
| O(6W)-Sm(1)-O(5)               | 138.98(10)  | O(3W)-Sm(1)-O(5)    | 115.69(8)  |
| <b>Complex 6<sup>(e)</sup></b> |             |                     |            |
| Er(1)-O(10)#1                  | 2.2293(12)  | Er(1)-O(3W)         | 2.2891(14) |
| Er(1)-O(9)                     | 2.298(3)    | Er(1)-O(5W)         | 2.3406(13) |
| Er(1)-O(8)                     | 2.341(3)    | Er(1)-O(4W)         | 2.3732(12) |
| Er(1)-O(6W)                    | 2.3914(15)  | Er(1)-O(7)          | 2.603(3)   |
| O(10)#1-Er(1)-O(3W)            | 92.12(4)    | O(10)#1-Er(1)-O(9)  | 95.72(8)   |
| O(3W)-Er(1)-O(9)               | 72.77(8)    | O(10)#1-Er(1)-O(5W) | 88.40(4)   |
| O(3W)-Er(1)-O(5W)              | 144.24(5)   | O(9)-Er(1)-O(5W)    | 142.74(8)  |
| O(10)#1-Er(1)-O(8)             | 132.88(7)   | O(3W)-Er(1)-O(8)    | 76.78(8)   |
| O(9)-Er(1)-O(8)                | 122.83(10)  | O(5W)-Er(1)-O(8)    | 76.86(8)   |
| O(10)#1-Er(1)-O(4W)            | 156.209(17) | O(3W)-Er(1)-O(4W)   | 106.8      |
| O(9)-Er(1)-O(4W)               | 76.92(8)    | O(5W)-Er(1)-O(4W)   | 84.5       |
| O(8)-Er(1)-O(4W)               | 67.24(8)    | O(10)#1-Er(1)-O(6W) | 76.14(5)   |
| O(3W)-Er(1)-O(6W)              | 144.10(6)   | O(9)-Er(1)-O(6W)    | 74.79(8)   |
| O(5W)-Er(1)-O(6W)              | 70.3        | O(8)-Er(1)-O(6W)    | 135.38(8)  |
| O(4W)-Er(1)-O(6W)              | 80.1        | O(10)#1-Er(1)-O(7)  | 80.71(7)   |
| O(3W)-Er(1)-O(7)               | 71.93(8)    | O(9)-Er(1)-O(7)     | 144.34(11) |
| O(5W)-Er(1)-O(7)               | 72.89(8)    | O(8)-Er(1)-O(7)     | 52.23(9)   |
| O(4W)-Er(1)-O(7)               | 118.41(7)□  | O(6W)-Er(1)-O(7)    | 136.63(8)  |

Symmetry codes: (a) #1:  $-x + 1, -y + 2, -z + 1$ ; (b) #1:  $-x + 1, -y + 1, -z + 2$ ; (c) #1:  $-x + 1, -y + 2, -z$ ; (d) #1:  $-x, -y + 1, -z + 2$ ; (e) #1:  $-x + 1, -y, -z$ .

**Table S2.** Analysis of Cole-Cole plot of complex 2

| $T$ (K) | $\chi_0$ (cm <sup>3</sup> /mol) | $\chi_{inf}$ (cm <sup>3</sup> /mol) | $\alpha$ | $R^2$ |
|---------|---------------------------------|-------------------------------------|----------|-------|
| 1.8     | 15.659(56)                      | 1.109(40)                           | 0.267(7) | 0.974 |
| 2.0     | 13.756(49)                      | 1.035(37)                           | 0.266(8) | 0.971 |
| 2.2     | 12.538(45)                      | 0.993(35)                           | 0.265(8) | 0.970 |
| 2.4     | 10.805(39)                      | 0.909(32)                           | 0.263(8) | 0.967 |
| 2.7     | 9.496(34)                       | 0.880(30)                           | 0.255(9) | 0.964 |
| 3.0     | 8.469(28)                       | 0.881(29)                           | 0.236(9) | 0.960 |
| 3.3     | 7.621(20)                       | 0.905(27)                           | 0.201(9) | 0.961 |

|     |           |           |          |       |
|-----|-----------|-----------|----------|-------|
| 3.6 | 6.893(11) | 0.953(23) | 0.149(8) | 0.972 |
| 3.8 | 6.461(8)  | 0.992(23) | 0.112(7) | 0.978 |
| 4.0 | 6.090(4)  | 1.019(20) | 0.085(5) | 0.990 |
| 4.2 | 5.768(3)  | 1.045(29) | 0.068(6) | 0.992 |
| 4.4 | 5.485(3)  | 1.027(40) | 0.069(6) | 0.994 |
| 4.6 | 5.219(2)  | 1.045(76) | 0.061(8) | 0.989 |
| 4.8 | 4.993(3)  | 1.198(75) | 0.050(0) | 0.979 |
| 5.0 | 4.770(1)  | 1.514(52) | 0.032(0) | 0.990 |

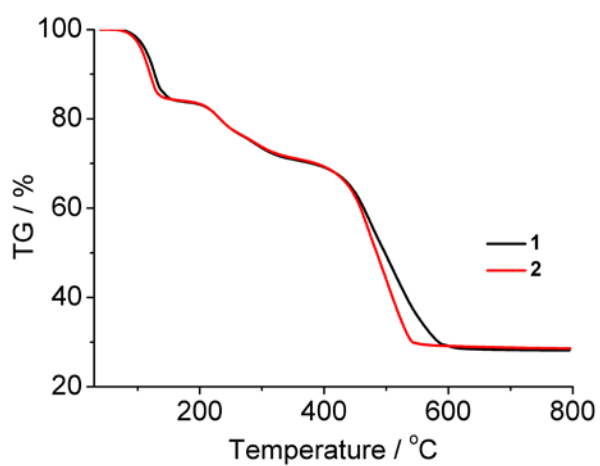

**Figure S1.** TGA trace of complexes **1 - 2**.

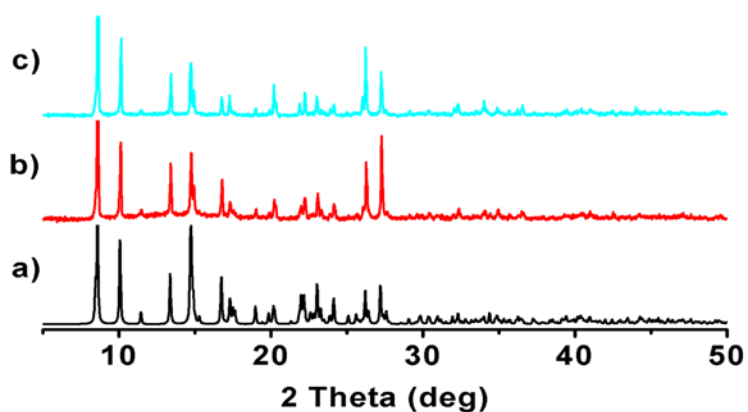

**Figure S2.** PXRD patterns (a) simulated based on the X-ray single crystal diffraction data of **2**, (b) for as-synthesized **1**, (c) for as-synthesized **2**.

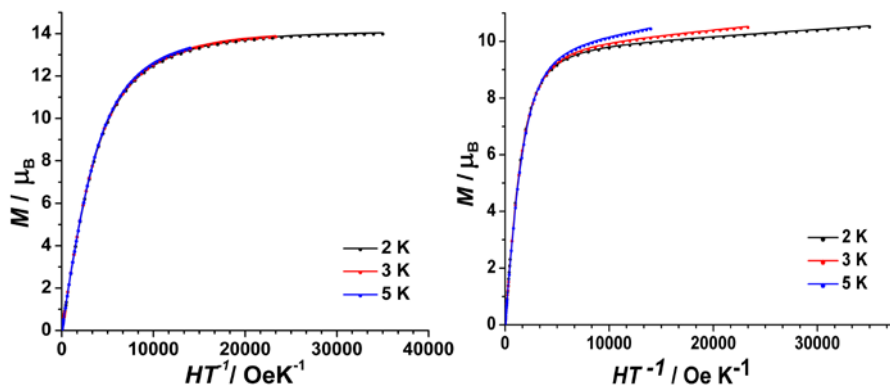

**Figure S3.** Plots of  $M$  vs.  $H/T$  measured between 2 and 5 K for complexes **1** and **2**.
